# Supplementary material for: Growth mechanism on graphene-regulated high-quality epitaxy of flexible AlN film
Source: Royal Society of Chemistry journal article supplement (doi:10.1039/d1ce00988e), 2021-01-01
Supplement: d1ce00988e1.pdf [file d1ce00988e1.pdf]

## Supporting Information

# Growth mechanism on graphene-regulated high-quality epitaxy of flexible AlN film

*Yanqing Jia, Haidi Wu, Jianglin Zhao, Haibin Guo, Yu Zeng, Boyu Wang, Chi Zhang,  
Yachao Zhang, Jing Ning \*, Jincheng Zhang \*, Tao Zhang\*, Dong Wang, Yue Hao*

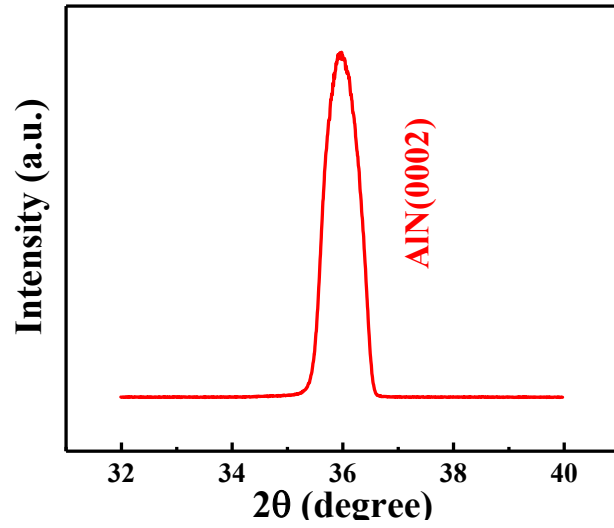

**Figure S1.**  $2\theta$ - $\omega$  scanning curve of AlN with growth time of 50 min.

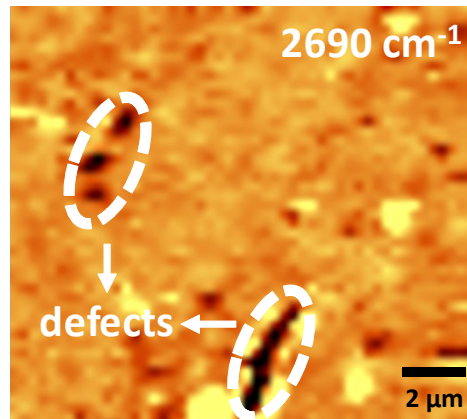

**Figure S2.** Raman mapping of 2D peak ( $2690\text{ cm}^{-1}$ ) of graphene on sample after epitaxial growth.
